# Supplementary material for: Modulation of work and power by the human lower-limb joints with increasing steady-state locomotion speed
Source: Oxford University Press journal article supplement (doi:10.1242/jeb.119156), 2015-01-01
Supplement: jeb119156supp.pdf [file jeb119156supp.pdf]

**Table S1** Group mean±1SD lower-limb joint work and average power for each locomotion speed.

|                     |       | W1         | W2         | R1         | R2         | R3         | R4          | R5          |
|---------------------|-------|------------|------------|------------|------------|------------|-------------|-------------|
| <b>Stance phase</b> |       |            |            |            |            |            |             |             |
| Positive            |       |            |            |            |            |            |             |             |
| Work (J/kg)         | Hip   | 0.13±0.03  | 0.20±0.09  | 0.06±0.04  | 0.10±0.08  | 0.12±0.11  | 0.20±0.13   | 0.51±0.17   |
|                     | Knee  | 0.16±0.05  | 0.21±0.05  | 0.33±0.12  | 0.45±0.14  | 0.52±0.14  | 0.49±0.17   | 0.45±0.14   |
|                     | Ankle | 0.32±0.07  | 0.45±0.10  | 0.73±0.10  | 0.97±0.12  | 1.29±0.19  | 1.30±0.13   | 1.32±0.20   |
| Power (W/kg)        | Hip   | 0.42±0.09  | 0.71±0.34  | 0.35±0.28  | 0.82±0.74  | 1.23±1.13  | 2.79±1.89   | 8.97±3.47   |
|                     | Knee  | 0.49±0.15  | 0.74±0.16  | 2.14±1.05  | 3.71±1.08  | 5.70±1.60  | 6.87±2.14   | 7.86±2.58   |
|                     | Ankle | 1.01±0.24  | 1.61±0.33  | 4.56±0.97  | 8.13±1.35  | 14.09±2.68 | 18.23±2.45  | 23.00±3.45  |
| Negative            |       |            |            |            |            |            |             |             |
| Work (J/kg)         | Hip   | -0.16±0.04 | -0.20±0.06 | -0.21±0.08 | -0.30±0.10 | -0.44±0.16 | -0.69±0.19  | -1.01±0.25  |
|                     | Knee  | -0.19±0.05 | -0.27±0.07 | -0.52±0.15 | -0.75±0.26 | -0.75±0.27 | -0.59±0.22  | -0.36±0.19  |
|                     | Ankle | -0.11±0.03 | -0.10±0.03 | -0.31±0.16 | -0.48±0.17 | -0.69±0.19 | -0.80±0.17  | -0.77±0.17  |
| Power (W/kg)        | Hip   | -0.50±0.12 | -0.72±0.22 | -1.33±0.63 | -2.52±0.78 | -4.80±1.83 | -9.57±2.17  | -17.86±5.58 |
|                     | Knee  | -0.60±0.13 | -0.97±0.24 | -3.22±0.97 | -6.17±1.93 | -8.03±2.41 | -8.24±2.71  | -6.14±3.04  |
|                     | Ankle | -0.36±0.11 | -0.38±0.11 | -2.01±1.26 | -4.13±1.72 | -7.62±2.45 | -11.35±3.03 | -13.58±3.18 |
| <b>Swing phase</b>  |       |            |            |            |            |            |             |             |
| Positive            |       |            |            |            |            |            |             |             |
| Work (J/kg)         | Hip   | 0.09±0.02  | 0.13±0.03  | 0.31±0.09  | 0.69±0.23  | 1.38±0.45  | 2.43±0.31   | 4.02±0.82   |
|                     | Knee  | 0.02±0.01  | 0.04±0.02  | 0.03±0.01  | 0.06±0.02  | 0.09±0.02  | 0.17±0.05   | 0.20±0.07   |
|                     | Ankle | 0.01±0.00  | 0.01±0.00  | 0.01±0.00  | 0.02±0.01  | 0.03±0.01  | 0.07±0.02   | 0.09±0.02   |
| Power (W/kg)        | Hip   | 0.46±0.08  | 0.67±0.22  | 1.34±0.32  | 2.64±0.90  | 5.47±1.86  | 10.91±1.52  | 23.04±5.07  |
|                     | Knee  | 0.11±0.04  | 0.21±0.08  | 0.12±0.05  | 0.22±0.06  | 0.37±0.09  | 0.75±0.25   | 1.17±0.40   |
|                     | Ankle | 0.04±0.01  | 0.07±0.02  | 0.06±0.02  | 0.08±0.04  | 0.14±0.05  | 0.29±0.09   | 0.53±0.09   |
| Negative            |       |            |            |            |            |            |             |             |
| Work (J/kg)         | Hip   | -0.05±0.02 | -0.08±0.02 | -0.04±0.02 | -0.13±0.06 | -0.24±0.09 | -0.40±0.14  | -0.92±0.29  |
|                     | Knee  | -0.15±0.02 | -0.19±0.03 | -0.29±0.06 | -0.60±0.08 | -1.14±0.25 | -1.98±0.31  | -3.09±0.46  |
|                     | Ankle | -0.01±0.00 | -0.01±0.00 | -0.00±0.00 | -0.00±0.00 | -0.01±0.01 | -0.01±0.01  | -0.01±0.01  |
| Power (W/kg)        | Hip   | -0.22±0.11 | -0.40±0.12 | -0.16±0.08 | -0.49±0.26 | -0.93±0.36 | -1.79±0.66  | -5.28±1.68  |
|                     | Knee  | -0.74±0.12 | -0.98±0.23 | -1.25±0.21 | -2.32±0.32 | -4.51±1.07 | -8.89±1.53  | -17.77±3.15 |
|                     | Ankle | -0.04±0.02 | -0.04±0.02 | -0.01±0.01 | -0.01±0.01 | -0.03±0.02 | -0.05±0.04  | -0.08±0.04  |

W1 walking at 1.59±0.09 m/s; W2 walking at 2.01±0.08 m/s; R1 running at 2.08±0.13 m/s; R2 running at 3.50±0.05 m/s; R3 running at 5.01±0.11 m/s; R4 running at 6.99±0.09 m/s; R5 running at 8.95±0.70 m/s.
